# Supplementary material for: Impact of alkaline metal ions Mg2+, Ca2+, Sr2+ and Ba2+ on the structural, optical, thermal and antibacterial properties of ZnO nanoparticles prepared by the co-precipitation method
Source: Royal Society of Chemistry journal article supplement (doi:10.1039/c3tb21068e), 2013-01-01
Supplement: c3tb21068e.pdf [file c3tb21068e.pdf]

## **Impact of alkaline metal ions $Mg^{2+}$ , $Ca^{2+}$ , $Sr^{2+}$ and $Ba^{2+}$ on the structural, optical, thermal and antibacterial properties of ZnO nanoparticles prepared by co-precipitation method**

**Abdulrahman Syedahamed Haja Hameed<sup>a,\*</sup>, Chandrasekaran Karthikeyan<sup>a</sup>, Venugopal Senthil kumar<sup>b</sup>, Subramanian Kumaresan<sup>b</sup> and Ganasan Ravi<sup>c</sup>**

<sup>a</sup> *PG and Research Department of Physics, Jamal Mohamed College, Tiruchirappalli-620 020, Tamil Nadu, India.*

<sup>b</sup> *Department of Plant biology and Plant biotechnology, R.K.M. Vivekananda College, Chennai-600 004, Tamil Nadu, India.*

<sup>c</sup> *School of Physics, Alagappa University, Karaikudi 630 003, Tamil Nadu, India.*

### **Characterization**

#### **X-Ray powder diffraction (XRD) studies**

The XRD patterns of the ZnO NPs samples were collected using a X'PERT PRO PANalytical X-ray diffractometer with  $CuK\alpha$  (40 kV, 30 mA) radiation source. The ZnO NPs samples were gently crushed before being smeared on a clean glass slide. The powder diffraction patterns were collected over the  $2\theta$  in the range between  $10^\circ$ - $80^\circ$  with a scan speed and sampling width of  $2\text{ min}^{-1}$  and  $0.05^\circ$  respectively.

#### **X-ray Photoelectron spectroscopy (XPS) studies**

The XPS measurements were performed with XPS instrument (Carl Zeiss) equipped with Ultra 55 FESEM with EDS. All the spectra were acquired at a pressure using ultra high vacuum with Al  $K\alpha$  excitation at 250W.

#### **High Resolution Scanning Electron Microscope studies**

HRSEM was performed on the ZnO samples using a FEI - QUANDA 200F microscope operating at 30 kV. The microscope was equipped with a charge-coupled device (CCD) camera. The samples were prepared by 1mg of ZnO NPs samples coated with 1.2 nm gold particle separation on a carbon tape using the low vacuum.

### **Energy dispersive X-ray spectroscopy studies**

Energy dispersive X-ray spectroscopy was done using an EDAX (model: AMETEK) with FEI - QUANTA 200F high resolution scanning electron microscope operated at 30 kV. Dry powdered samples were attached to the substrate using a double-sided carbon tape and mounted onto the sample holder.

### **Fourier Transforms Infra-Red (FT-IR) spectroscopy studies**

Perkin-Elmer Fourier transform infra-red (FT-IR) spectrometer was used in transmission mode and the corresponding spectra were recorded in the range of 4000-400  $\text{cm}^{-1}$  using the KBr pellet technique for pure ZnO and alkaline metal ions  $\text{Mg}^{2+}$ ,  $\text{Ca}^{2+}$ ,  $\text{Sr}^{2+}$  and  $\text{Ba}^{2+}$  doped ZnO NPs samples.

### **Photoluminescence (PL) studies**

Room temperature PL measurements were performed for the pure ZnO and alkaline metal ions  $\text{Mg}^{2+}$ ,  $\text{Ca}^{2+}$ ,  $\text{Sr}^{2+}$  and  $\text{Ba}^{2+}$  doped ZnO NPs samples with excitation wavelength of 254 nm using Jobin yvon Fluorolog-3-11 spectrofluorometer having Xenon lamp 450W as a source and resolution of 0.2 nm. The emission spectra were recorded in the UV and visible range (270-600nm) using as software DATA MAX / GRAMS/31.

### **Thermal analysis**

The thermogravimetric and differential thermal analysis was carried out by using of TGA Q500 U20.10 Build 36 thermal analyzer for pure ZnO and alkaline metal ions  $\text{Mg}^{2+}$ ,  $\text{Ca}^{2+}$ ,  $\text{Sr}^{2+}$  and  $\text{Ba}^{2+}$  doped ZnO NPs samples recorded in the temperature range 30-800°C, in nitrogen atmosphere with a heating rate of 20  $^{\circ}\text{C min}^{-1}$ .

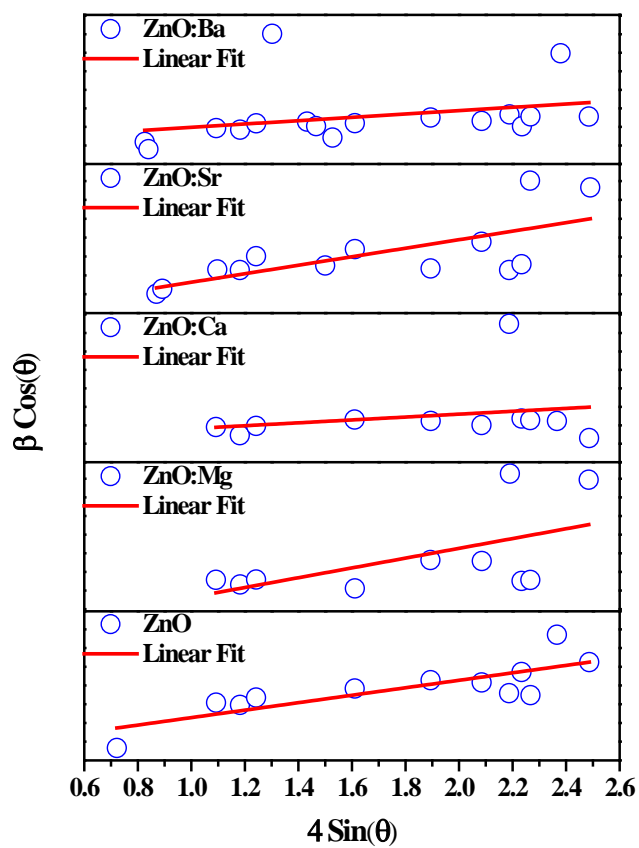

**Figure S1.** The William-Hall plot analysis of (a) Pure ZnO, (b) ZnO:Mg, (c) ZnO:Ca, (d) ZnO:Sr and (e) ZnO:Ba NPs solid line show the theoretical fit.

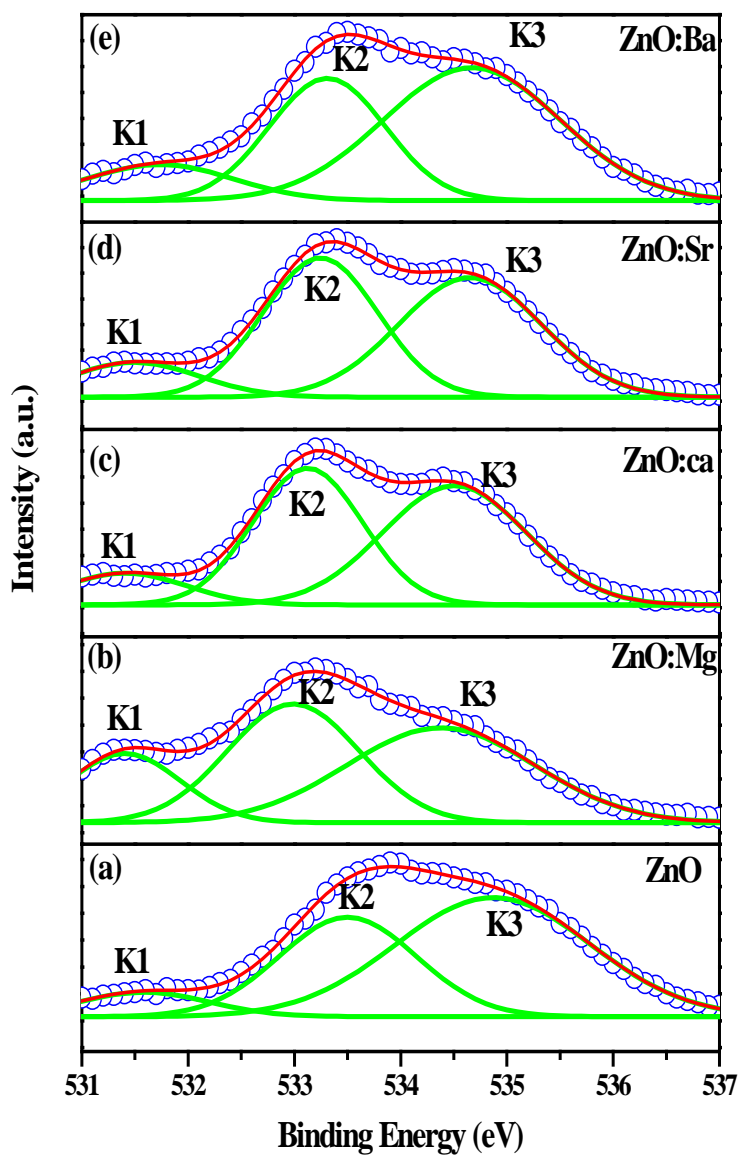

**Figure S2.** XPS spectra of O (1s) for (a) Pure ZnO, (b) ZnO:Mg, (c) ZnO:Ca, (d) ZnO:Sr and (e) ZnO:Ba NPs.

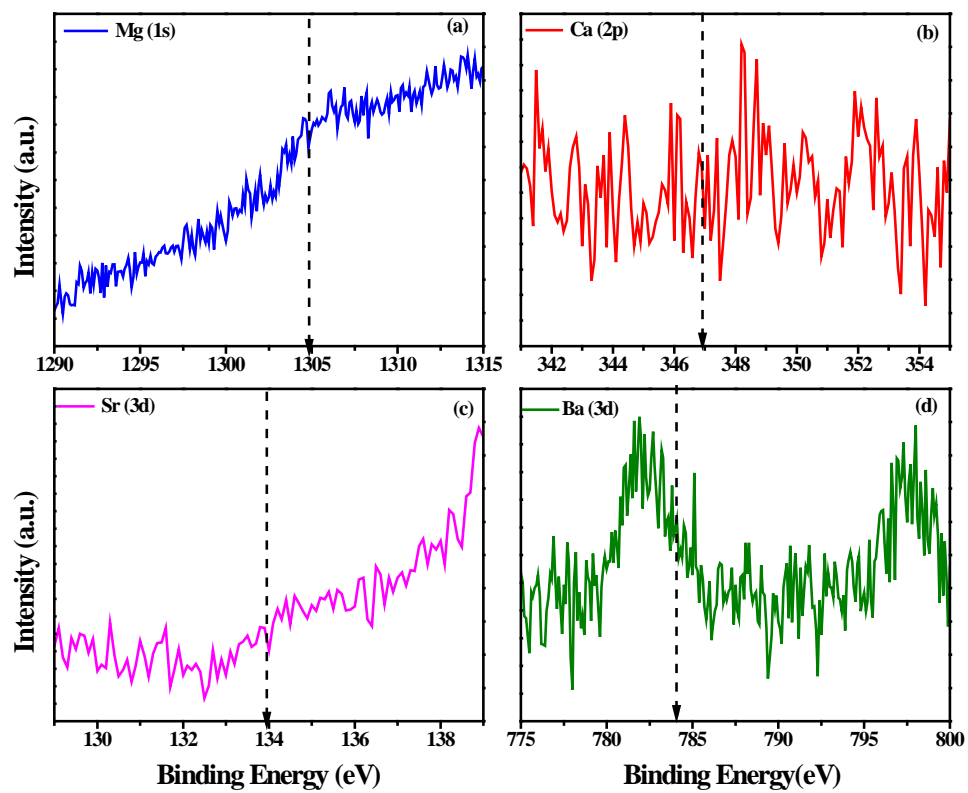

**Figure S3.** XPS spectra of (a) ZnO:Mg, (b) ZnO:Ca, (c) ZnO:Sr and (d) ZnO:Ba NPs.

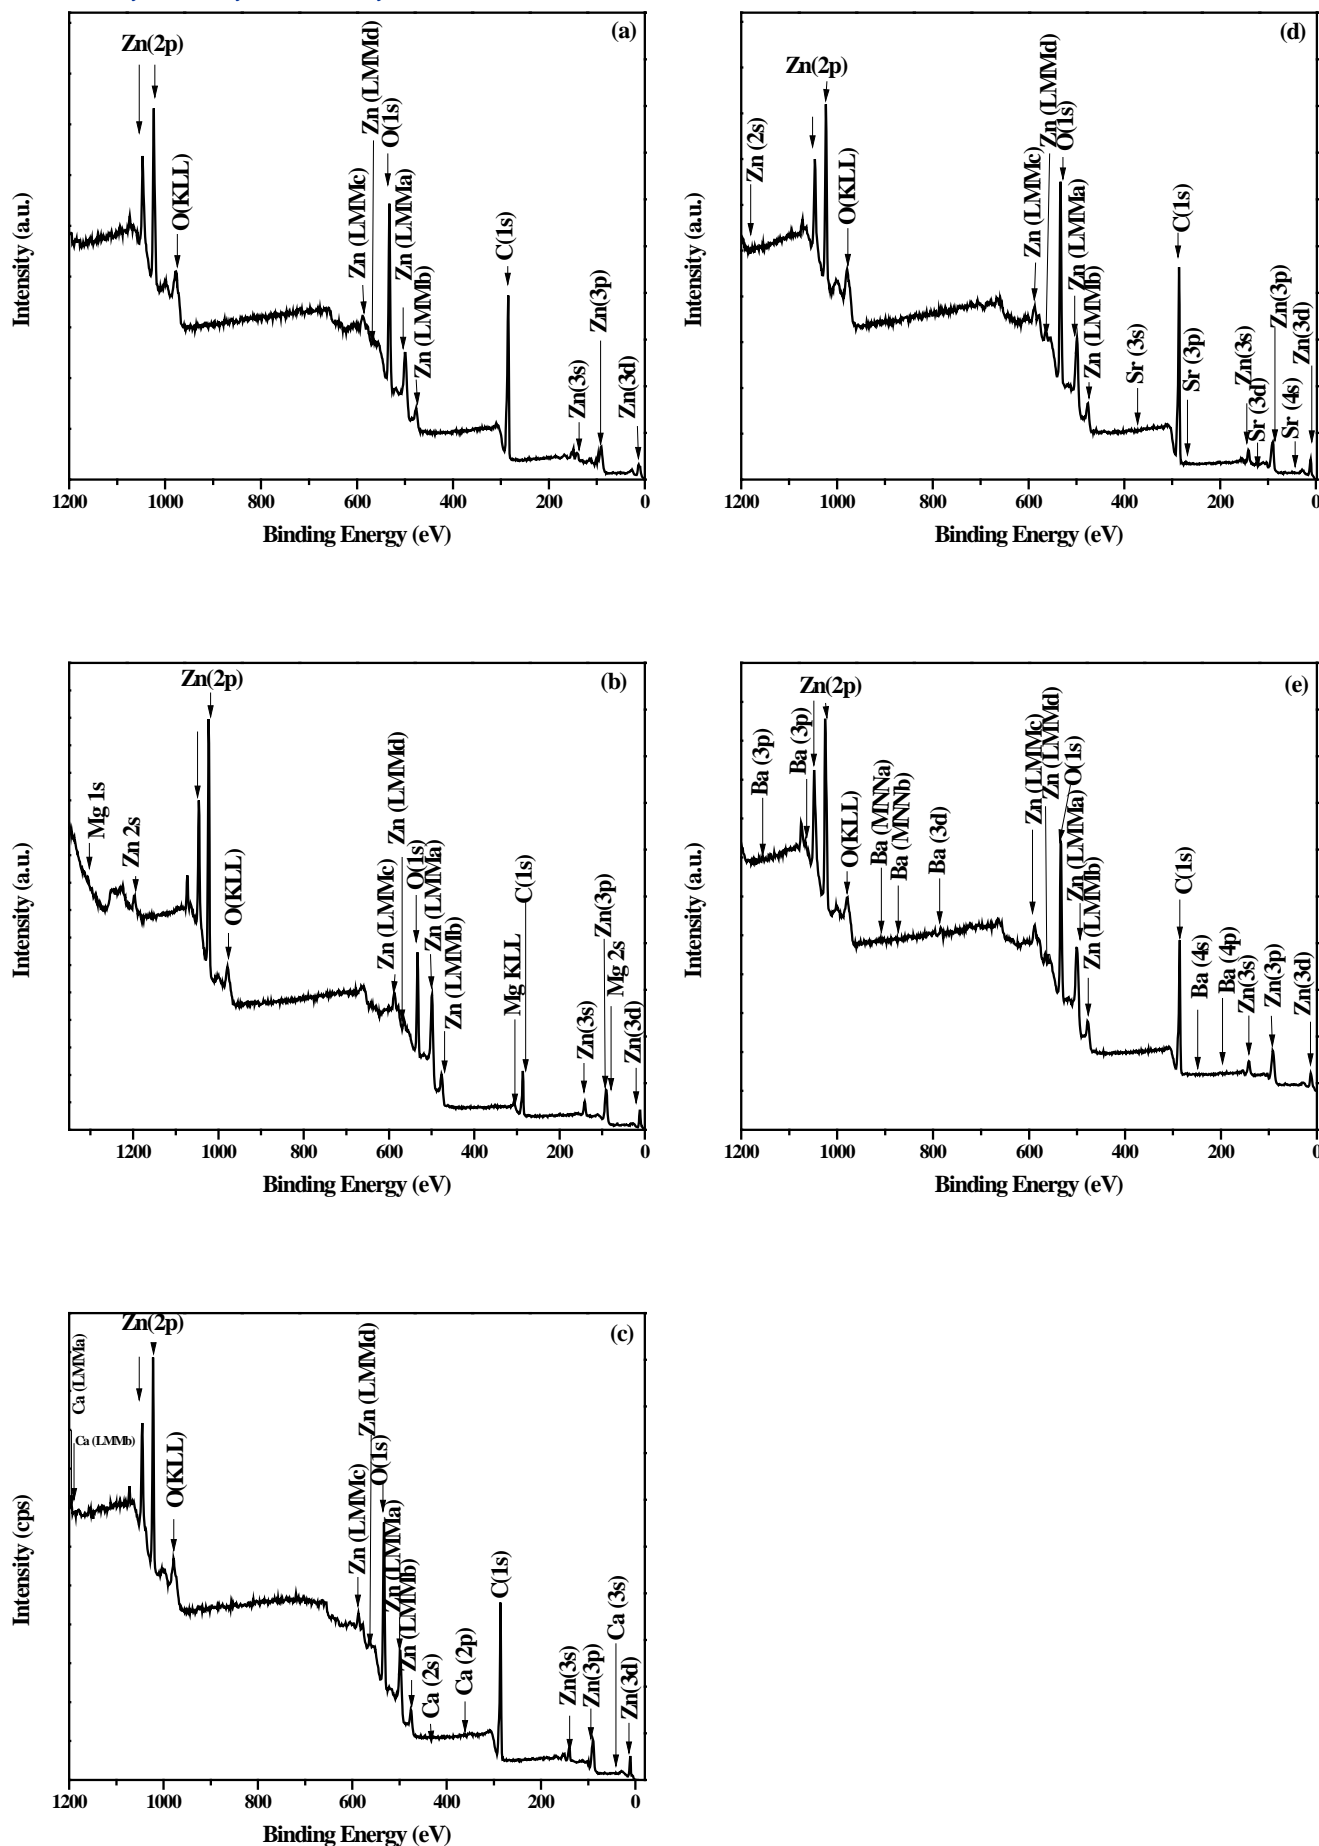

**Figure S4.** XPS wide scan graph of (a) Pure ZnO, (b) ZnO:Mg, (c) ZnO:Ca, (d) ZnO:Sr and (e) ZnO:Ba.

**Table S1.** Atomic and Mass Concentration percentage of Pure ZnO and alkaline metal ions doped ZnO NPs for XPS spectra.

| Zn 2p      |            | O 1s       |            | Doping %     |              |
|------------|------------|------------|------------|--------------|--------------|
| Atom. Con% | Mass. Con% | Atom. Con% | Mass. Con% | Atom. Con%   | Mass. Con%   |
| 18.39      | 47.94      | 81.61      | 52.06      | -            | -            |
| 32.61      | 66.37      | 67.15      | 33.44      | 0.24 (Mg 1s) | 0.18(Mg 1s)  |
| 19.29      | 49.37      | 80.62      | 50.48      | 0.09 (Ca 2p) | 0.15(Ca 2p)  |
| 16.83      | 45.22      | 83.13      | 54.64      | 0.04(Sr 3d)  | 0.14 (Sr 3d) |
| 21.03      | 51.08      | 78.53      | 46.67      | 0.44 (Ba 3d) | 2.25 (Ba 3d) |

**Table S2.** The elemental composition of the synthesized ZnO NPs.

| Sample        | At%   |       |               | Total |
|---------------|-------|-------|---------------|-------|
|               | Zn    | O     | Doping amount |       |
| <b>ZnO</b>    | 61.27 | 38.73 | -             | 100%  |
| <b>ZnO:Mg</b> | 61.79 | 34.61 | 3.6(Mg)       | 100%  |
| <b>ZnO:Ca</b> | 53.19 | 44.64 | 2.17(Ca)      | 100%  |
| <b>ZnO:Sr</b> | 51.79 | 46.9  | 1.31(Sr)      | 100%  |
| <b>ZnO:Ba</b> | 44.72 | 53.74 | 1.54(Ba)      | 100%  |

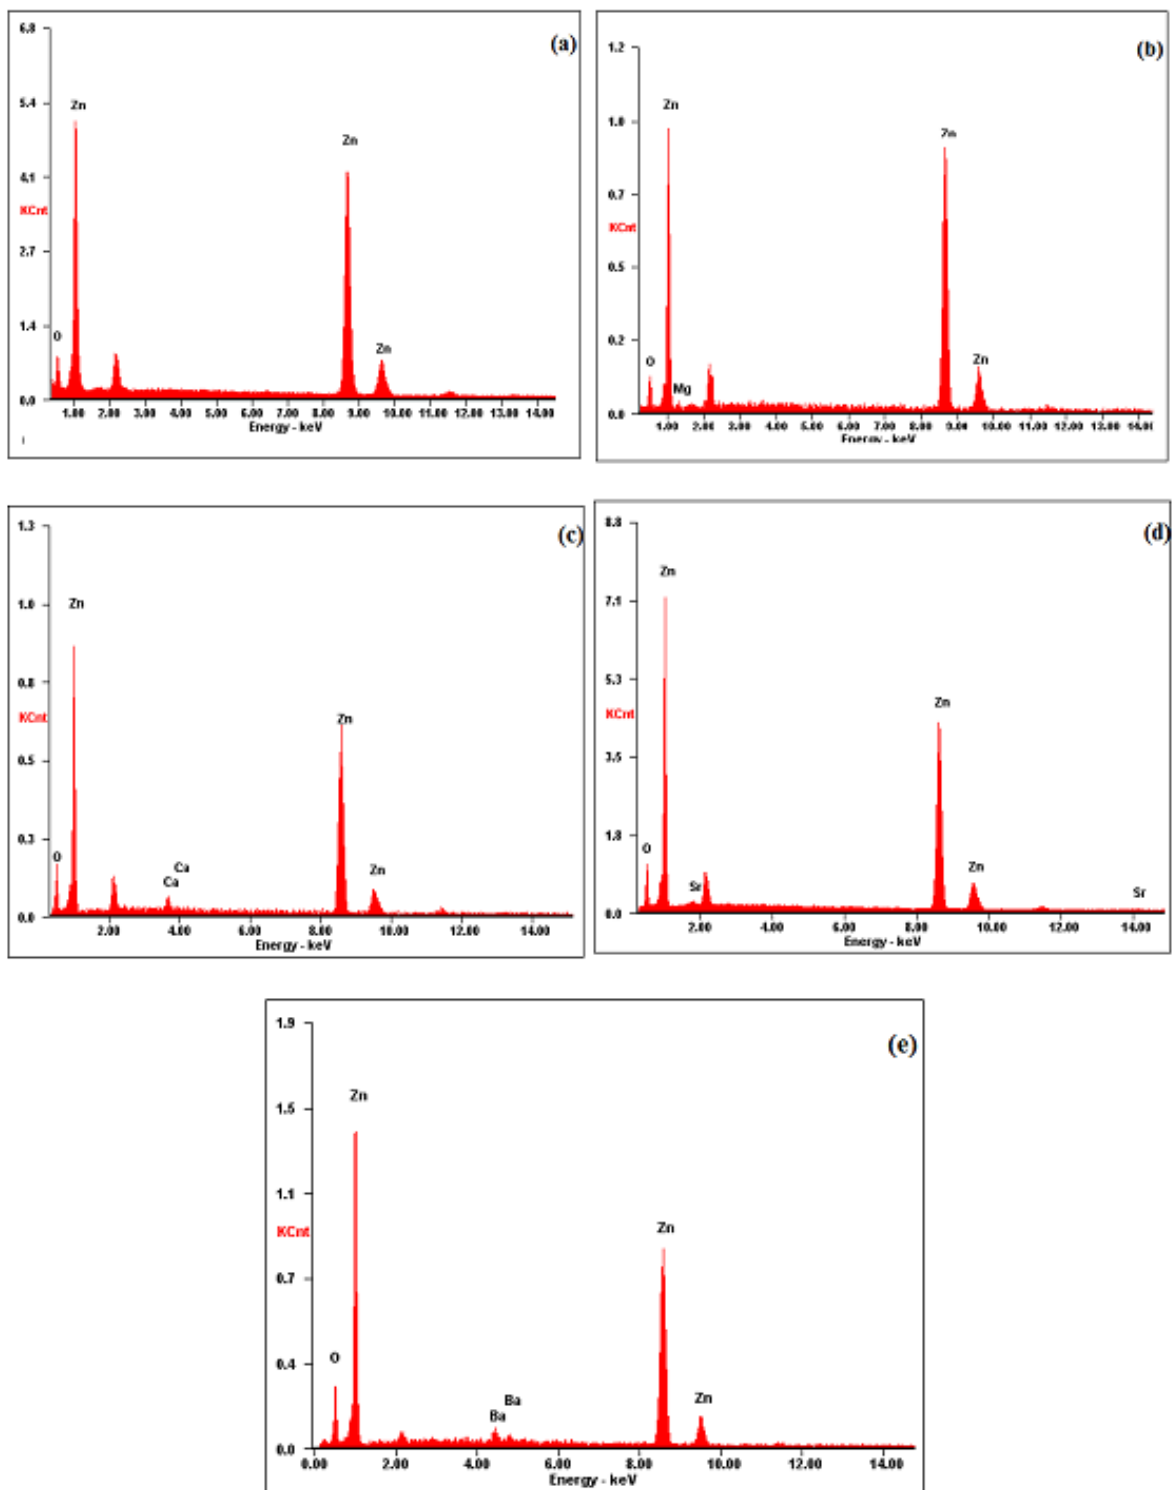

**Figure S5.** EDAX spectra of (a) Pure ZnO, (b) ZnO:Mg, (c) ZnO:Ca, (d) ZnO:Sr and (e) ZnO:Ba NPs.



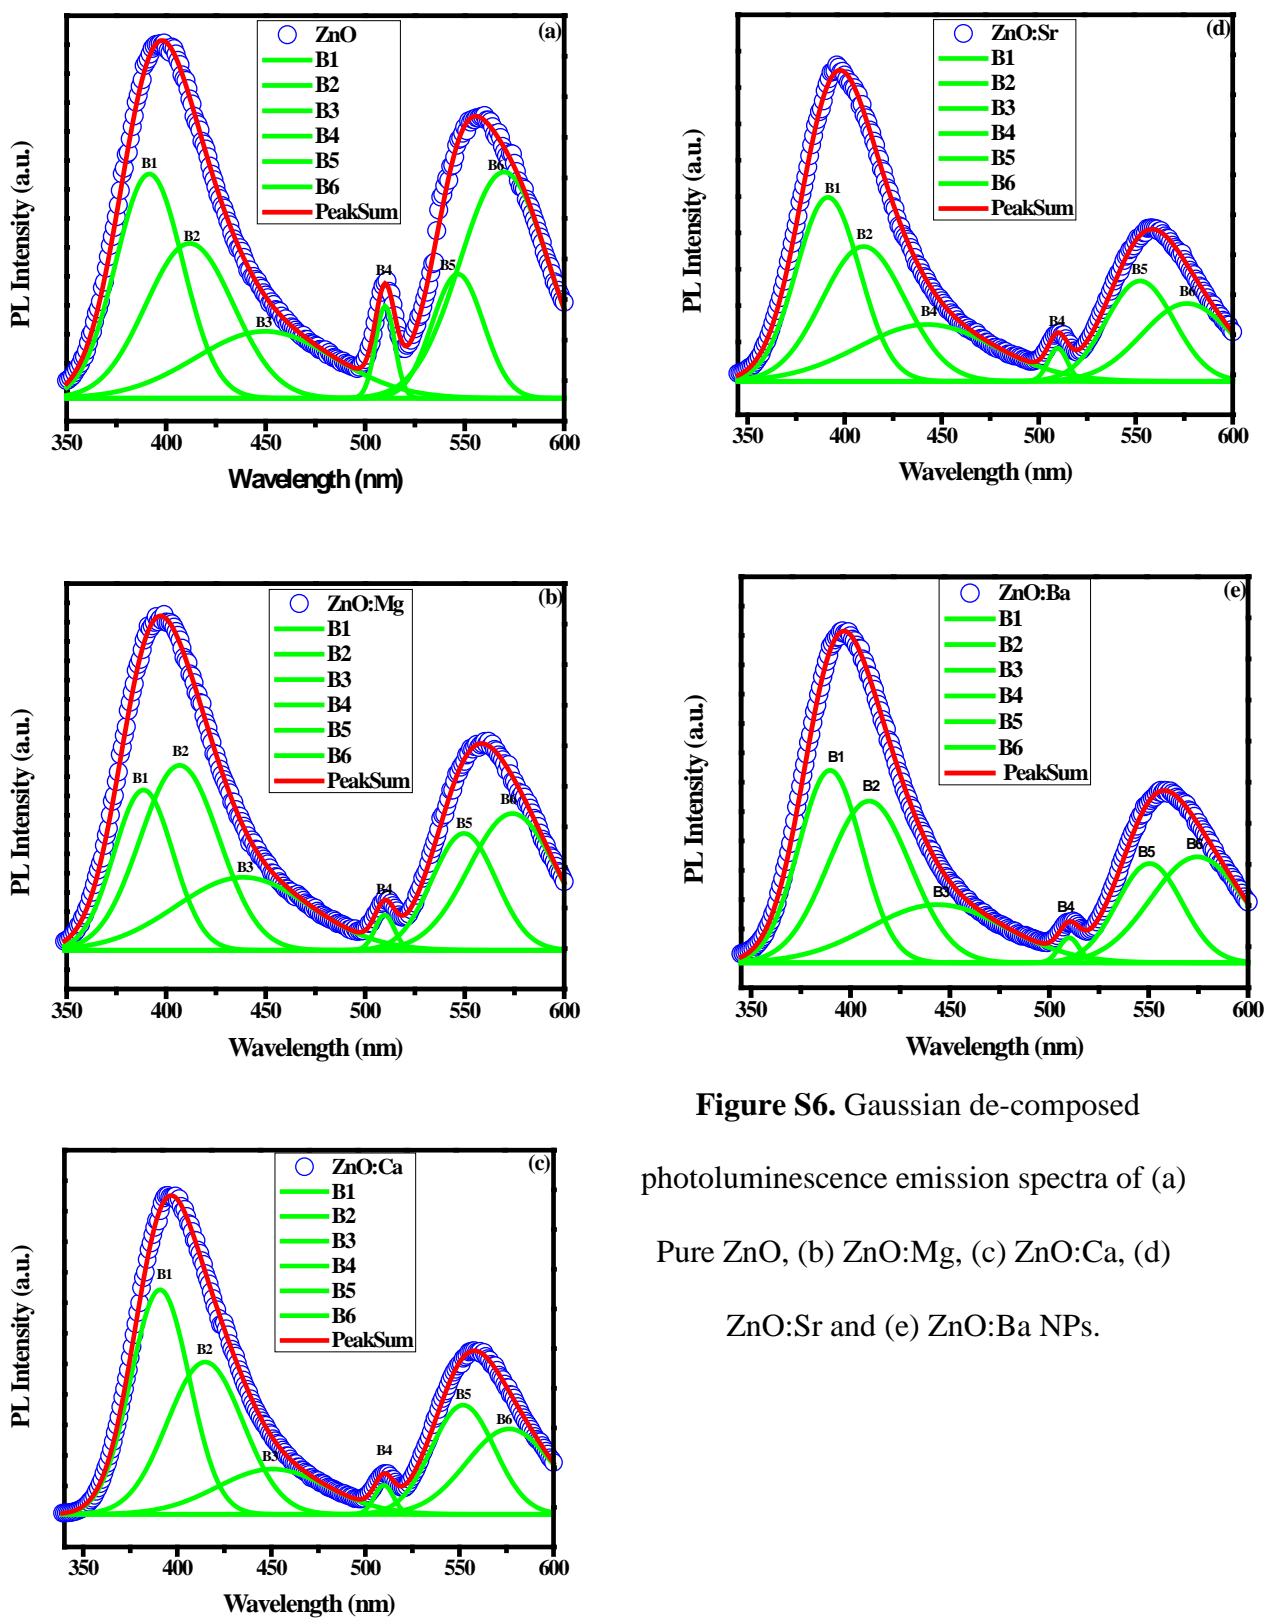

**Figure S6.** Gaussian de-composed photoluminescence emission spectra of (a) Pure ZnO, (b) ZnO:Mg, (c) ZnO:Ca, (d) ZnO:Sr and (e) ZnO:Ba NPs.
